# Supplementary material for: Mental Health in Children of Immigrants in Germany: The Role of Socio-Demographic and Immigration-Related Characteristics
Source: Springer Nature journal article supplement (doi:10.1007/s10826-021-02141-9), 2021-11-08
Supplement: MOESM1 [file 19846766]

**Appendix A**

Measurement invariance test

Measurement invariance of the SOEP-SDQ between migrant and non-migrant respondents were analysed using Multi Group Confirmatory Factor Analysis (MGCFA). We followed the process recommended by Hirschfeld & Von Brachel (2014), with first establishing a configural model, second testing for configural equivalence (same loadings are significant across groups), third testing for weak/metric equivalence (loadings are constrained to be equal) and fourth testing for strong/scalar invariance (intercepts are constrained to be equal). Residual covariances were allowed for items from the same subscale. In case of measurement variance, loadings/intercepts were freed one by one to reach partial invariance. We used the Comparative Fit Index (CFI) and the Root Mean Square Error of Approximation (RMSEA) to evaluate the model fit. A CFI > 0.90 was rated as acceptable and > 0.95 as good, a RMSEA < 0.6 was rated as good (Hu & Bentler, 1999). To evaluate the meaningfulness of changes of the model fit we used the change in the CFI (ΔCFI) because this index is proposed to be independent of overall model fit and sample size. A value of ΔCFI smaller than or equal to – 0.01 indicates that the null hypothesis of invariance should not be rejected (Cheung & Rensvold, 2002). Missings were dropped listwise. Results can be found in theTable 1.

**References**

Cheung, G. W., & Rensvold, R. B. (2002). Evaluating Goodness-of-Fit Indexes for Testing Measurement Invariance. *Structural Equation Modeling: A Multidisciplinary Journal*, *9*(2), 233–255. https://doi.org/10.1207/S15328007SEM0902_5

Hirschfeld, G., & Von Brachel, R. (2014). Multiple-Group confirmatory factor analysis in R-A tutorial in measurement invariance with continuous and ordinal indicators. *Practical Assessment, Research & Evaluation*, *19*(7).

Hu, L., & Bentler, P. M. (1999). Cutoff criteria for fit indexes in covariance structure analysis: Conventional criteria versus new alternatives. *Structural Equation Modeling: A Multidisciplinary Journal*, *6*(1), 1–55. https://doi.org/10.1080/10705519909540118

**Table A1**

***Measurement Invariance: Parental migrant (N=1627) and German native respondents (N=3040)***

|  | **Configural** | **Weak** | **Strong** | **Partial strong**  (4 intercepts freed) |
| --- | --- | --- | --- | --- |
| **Degrees of freedom** | 98 | 110 | 122 | 118 |
| **Robust Chi²** | 1020.401** | 1070.452** | 1404.133** | 1174.313** |
| **Δ²** |  | 50.051 | 333.681 | 103.861 |
| **Robust Chi² Groups**  Native German respondents | 733.982 | 741.800 | 839.790 | 773.643 |
| Migrant respondents | 286.419 | 328.652 | 564.343 | 400.669 |
| **Robust CFI** | 0.927 | 0.923 | 0.900 | 0.917 |
| **ΔCFI** |  | 0.004 | 0.023 | 0.006 |
| **Robust RMSEA (90 % CI)** | 0.069  (0.065-0.073) | 0.067  (0.063-0.071) | 0.073  (0.069-0.076) | 0.067  (0.064-0.071) |
| **ΔRMSEA** |  | 0.002 | 0.006 | 0.000 |
| **Robust SRMR** | 0.050 | 0.056 | 0.062 | 0.058 |

**p<0.05;**p<0.01*

**Appendix B**

Detailed regression coefficients

**Table B1**

***Immigrant status of the child, SES and SDQ total difficulties score: regression coefficients on the items that showed missing strong measurement invariance***

|  | *B* | Standard Error | *p* | Beta |
| --- | --- | --- | --- | --- |
| **Regressions on Item SDQ15** | | | | |
| Both parents born abroad* | 0.30 | 0.09 | 0.001 | 0.07 |
| One Native German parent, one immigrant parent* | -0.03 | 0. | 0.75 | -0.01 |
| Both parents are immigrants, at least one born in Germany (2nd generation)* | 0.54 | 0.142 | 0 | 0.074 |
| **Regressions on Item SDQ4** | | | | |
| Both parents born abroad* | -0.51 | 0.08 | 0 | -0.12 |
| One Native German parent, one immigrant parent* | -0.08 | 0.09 | 0.41 | -0.02 |
| Both parents are immigrants, at least one born in Germany (2nd generation)* | -0.29 | 0.14 | 0.04 | -0.04 |
| **Regressions on Item SDQ12** | | | | |
| Both parents born abroad* | -0.33 | 0.08 | 0 | -0.07 |
| One Native German parent, one immigrant parent* | 0.05 | 0.1 | 0.6 | 0.01 |
| Both parents are immigrants, at least one born in Germany (2nd generation)* | -0.26 | 0.14 | 0.07 | -0.03 |
| **Regressions on Item SDQ11** | | | | |
| Both parents born abroad* | -0.16 | 0.08 | 0.05 | -0.04 |
| One Native German parent, one immigrant parent* | 0.17 | 0.09 | 0.05 | 0.03 |
| Both parents are immigrants, at least one born in Germany (2nd generation)* | 0.06 | 0.13 | 0.67 | 0.01 |
| *Child immigrant status variables are dummy variables with German native children serving as reference group | | | | |

| **Table B2**  ***Maternal immigration-related characteristics, her mental health and children’s emotional and behavioural problems*** | | | | | | |
| --- | --- | --- | --- | --- | --- | --- |
|  |  |  |  |  |  |  |
| **Regressions:** |  |  |  |  |  |  |
|  |  | ***B*** | **Standard Error** | **z-value** | ***p*** | **Beta** |
| Regressions on Child's SDQ score (direct effects) | | | | | | |
| Gender of the child |  | -0.302 | 0.085 | -3.551 | 0 | -0.171 |
| Age |  | -0.011 | 0.008 | -1.301 | 0.193 | -0.067 |
| Mental health (MCS) |  | -0.017 | 0.005 | -3.137 | 0.002 | -0.182 |
| SES (ISEI) |  | -0.007 | 0.003 | -2.379 | 0.017 | -0.133 |
| Age at migration |  | 0.005 | 0.006 | 0.967 | 0.334 | 0.07 |
| German language skills |  | -0.076 | 0.032 | -2.397 | 0.017 | -0.159 |
| Perceived discrimination |  | 0.173 | 0.096 | 1.811 | 0.07 | 0.095 |
| Born in former Soviet Union |  | -0.002 | 0.135 | -0.014 | 0.989 | -0.001 |
| Born in Turkey |  | -0.283 | 0.152 | -1.863 | 0.062 | -0.07 |
| Born in Eastern Europe |  | -0.219 | 0.142 | -1.542 | 0.123 | -0.085 |
| Born in Southeast Europe |  | -0.21 | 0.136 | -1.552 | 0.121 | -0.095 |
| Born in other Region |  | -0.064 | 0.181 | -0.353 | 0.724 | -0.021 |
| Regressions on Mental health (MCS) | | | | | | |
| Age |  | 0.049 | 0.105 | 0.467 | 0.641 | 0.029 |
| SES (ISEI) |  | 0.05 | 0.028 | 1.76 | 0.078 | 0.091 |
| Age at migration |  | -0.124 | 0.073 | -1.704 | 0.088 | -0.152 |
| German language skills |  | -0.931 | 0.333 | -2.796 | 0.005 | -0.184 |
| Perceived discrimination |  | -3.55 | 1.055 | -3.364 | 0.001 | -0.184 |
| Born in Former Soviet Union |  | -0.509 | 1.835 | -0.278 | 0.781 | -0.023 |
| Born in Turkey |  | 3.497 | 1.927 | 1.815 | 0.07 | 0.082 |
| Born in Eastern Europe |  | 3.971 | 1.927 | 2.061 | 0.039 | 0.145 |
| Born in Southeast Europe |  | 4.68 | 1.921 | 2.436 | 0.015 | 0.2 |
| Born in other Region |  | 2.664 | 1.937 | 1.376 | 0.169 | 0.083 |
|  |  | ***B*** | **Standard Error** | **z-value** | ***p*** | **Beta** |
| Intercepts: |  |  |  |  |  |  |
| Child's SDQ score |  | 4.958 | 0.53 | 9.357 | 0 | 5.6 |
| Mental health (MCS) |  | 58.601 | 5.042 | 11.622 | 0 | 6.262 |
|  |  |  |  |  |  |  |
| Variances: |  |  |  |  |  |  |
| Child's SDQ score |  | 0.657 | 0.052 | 12.576 | 0 | 0.838 |
| Mental health (MCS) |  | 78.779 | 5.915 | 13.318 | 0 | 0.9 |
|  |  |  |  |  |  |  |
| **Mediation paths** | | | | | | |
| MCS*SES (ISEI) |  | -0.001 | 0.001 | -1.478 | 0.139 | -0.016 |
| MCS*Age at migration |  | 0.002 | 0.001 | 1.603 | 0.109 | 0.028 |
| MCS*German language skills |  | 0.016 | 0.008 | 2.127 | 0.033 | 0.033 |
| MCS* Perceived discrimination |  | 0.061 | 0.028 | 2.218 | 0.027 | 0.033 |
| MCS*Born in Former Soviet Union |  | 0.009 | 0.032 | 0.274 | 0.784 | 0.004 |
| MCS*Born in Turkey |  | -0.06 | 0.039 | -1.547 | 0.122 | -0.015 |
| MCS*Born in Eastern Europe |  | -0.068 | 0.038 | -1.801 | 0.072 | -0.026 |
| MCS*Born in Southeast Europe |  | -0.081 | 0.041 | -1.953 | 0.051 | -0.036 |
| MCS*Born in other Region |  | -0.046 | 0.036 | -1.278 | 0.201 | -0.015 |
| **Total effects (Mediation + direct effect)** | | | | | | |
| SES (ISEI) |  | -0.008 | 0.003 | -2.593 | 0.01 | -0.149 |
| Age at migration |  | 0.008 | 0.006 | 1.34 | 0.18 | 0.098 |
| German language skills |  | -0.06 | 0.033 | -1.827 | 0.068 | -0.126 |
| Perceived discrimination |  | 0.235 | 0.095 | 2.48 | 0.013 | 0.128 |
| Born in Former Soviet Union |  | 0.007 | 0.137 | 0.051 | 0.96 | 0.003 |
| Born in Turkey |  | -0.343 | 0.158 | -2.169 | 0.03 | -0.085 |
| Born in Eastern Europe |  | -0.288 | 0.142 | -2.033 | 0.042 | -0.111 |
| Born in Southeast Europe |  | -0.291 | 0.136 | -2.142 | 0.032 | -0.132 |
| Born in other Region |  | -0.11 | 0.184 | -0.595 | 0.552 | -0.036 |

| **Table B3.**  ***Paternal immigration-related characteristics, his mental health and children’s emotional and behavioural problems*** | | | | | | |
| --- | --- | --- | --- | --- | --- | --- |
|  |  | ***B*** | **Standard Error** | **z-value** | ***p*** | **Beta** |
| **Regressions on Child's SDQ score (direct effects)** | | | | | | |
| Gender of the child |  | -0.148 | 0.096 | -1.546 | 0.122 | -0.08 |
| Age |  | -0.003 | 0.008 | -0.43 | 0.667 | -0.023 |
| Mental health (MCS) |  | -0.011 | 0.005 | -2.01 | 0.044 | -0.096 |
| SES (ISEI) |  | -0.007 | 0.004 | -1.754 | 0.079 | -0.105 |
| Age at migration |  | -0.011 | 0.005 | -2.368 | 0.018 | -0.153 |
| German language skills |  | -0.051 | 0.031 | -1.648 | 0.099 | -0.104 |
| Perceived discrimination |  | 0.046 | 0.093 | 0.499 | 0.618 | 0.025 |
| Born in Former Soviet Union |  | -0.063 | 0.157 | -0.4 | 0.689 | -0.025 |
| Born in Turkey |  | -0.17 | 0.141 | -1.207 | 0.227 | -0.065 |
| Born in Eastern Europe |  | 0.112 | 0.162 | 0.693 | 0.488 | 0.036 |
| Born in Southeast Europe |  | -0.044 | 0.139 | -0.315 | 0.753 | -0.018 |
| Born in other Region |  | 0.117 | 0.18 | 0.649 | 0.517 | 0.035 |
| **Regressions on Mental health (MCS)** | | | | | | |
| Age |  | -0.05 | 0.075 | -0.665 | 0.506 | -0.039 |
| SES (ISEI) |  | -0.009 | 0.026 | -0.352 | 0.725 | -0.016 |
| Age at migration |  | 0.028 | 0.044 | 0.639 | 0.523 | 0.042 |
| German language skills |  | 0.094 | 0.308 | 0.306 | 0.76 | 0.021 |
| Perceived discrimination |  | -2.427 | 0.848 | -2.862 | 0.004 | -0.148 |
| Born in Former Soviet Union |  | -1.472 | 1.314 | -1.12 | 0.263 | -0.065 |
| Born in Turkey |  | -0.27 | 1.406 | -0.192 | 0.848 | -0.012 |
| Born in Eastern Europe |  | -0.487 | 1.827 | -0.267 | 0.79 | -0.017 |
| Born in Southeast Europe |  | 3.243 | 1.19 | 2.725 | 0.006 | 0.153 |
| Born in other Region |  | 0.37 | 1.514 | 0.245 | 0.807 | 0.012 |
|  |  |  |  |  |  |  |
|  |  | ***B*** | **Standard Error** | **z-value** | ***p*** | **Beta** |
| **Intercepts** |  |  |  |  |  |  |
| Child's SDQ score |  | 4.331 | 0.559 | 7.753 | 0 | 4.725 |
| Mental health (MCS) |  | 56.543 | 3.527 | 16.033 | 0 | 6.928 |
|  |  |  |  |  |  |  |
| **Variances** |  |  |  |  |  |  |
| Child's SDQ score |  | 0.793 | 0.057 | 13.948 | 0 | 0.944 |
| Mental health (MCS) |  | 62.83 | 6.474 | 9.705 | 0 | 0.943 |
|  |  |  |  |  |  |  |
| **Mediation paths** | | | | | | |
| MCS*SES (ISEI) |  | 0 | 0 | 0.347 | 0.729 | 0.002 |
| MCS*Age at migration |  | 0 | 0 | -0.617 | 0.537 | -0.004 |
| MCS*German language skills |  | -0.001 | 0.003 | -0.306 | 0.76 | -0.002 |
| MCS* Perceived discrimination |  | 0.026 | 0.016 | 1.644 | 0.1 | 0.014 |
| MCS*Born in Former Soviet Union |  | 0.016 | 0.016 | 1.005 | 0.315 | 0.006 |
| MCS*Born in Turkey |  | 0.003 | 0.015 | 0.191 | 0.849 | 0.001 |
| MCS*Born in Eastern Europe |  | 0.005 | 0.02 | 0.267 | 0.79 | 0.002 |
| MCS*Born in Southeast Europe |  | -0.035 | 0.021 | -1.651 | 0.099 | -0.015 |
| MCS*Born in other Region |  | -0.004 | 0.016 | -0.244 | 0.807 | -0.001 |
| **Total effects (Mediation + direct effect)** | | | | | | |
| SES (ISEI) |  | -0.006 | 0.004 | -1.731 | 0.083 | -0.104 |
| Age at migration |  | -0.012 | 0.005 | -2.417 | 0.016 | -0.157 |
| German language skills |  | -0.052 | 0.031 | -1.692 | 0.091 | -0.106 |
| Perceived discrimination |  | 0.072 | 0.092 | 0.79 | 0.43 | 0.039 |
| Born in Former Soviet Union |  | -0.047 | 0.156 | -0.302 | 0.763 | -0.019 |
| Born in Turkey |  | -0.167 | 0.144 | -1.161 | 0.246 | -0.064 |
| Born in Eastern Europe |  | 0.117 | 0.16 | 0.732 | 0.464 | 0.038 |
| Born in Southeast Europe |  | -0.079 | 0.137 | -0.572 | 0.567 | -0.033 |
| Born in other Region |  | 0.113 | 0.183 | 0.616 | 0.538 | 0.034 |
